# Supplementary material for: Glut-3 Gene Knockdown as a Potential Strategy to Overcome Glioblastoma Radioresistance
Source: MDPI journal article supplement (doi:10.3390/ijms25042079), 2024-02-08
Supplement: s1 [file s1]

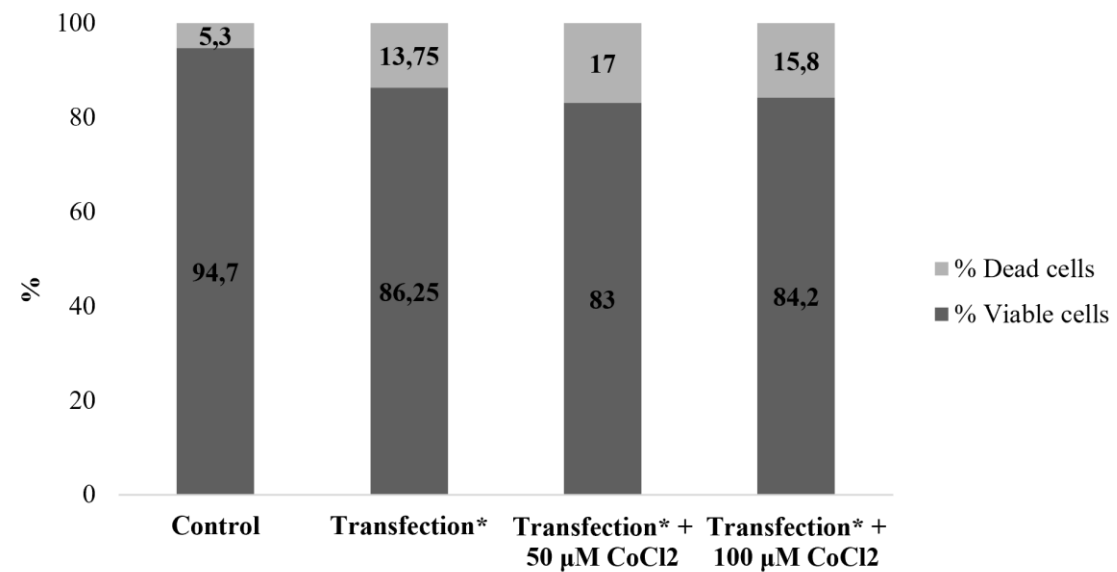

**Supplementary file S1.** Percentages of viable and dead cells in the control, after the transfection treatment \*(1 µl/ml of transfecting agent and 0.8 µg/ml of plasmid DNA) or the co-treatment with transfection and 50 or 100 µM CoCl<sub>2</sub>.

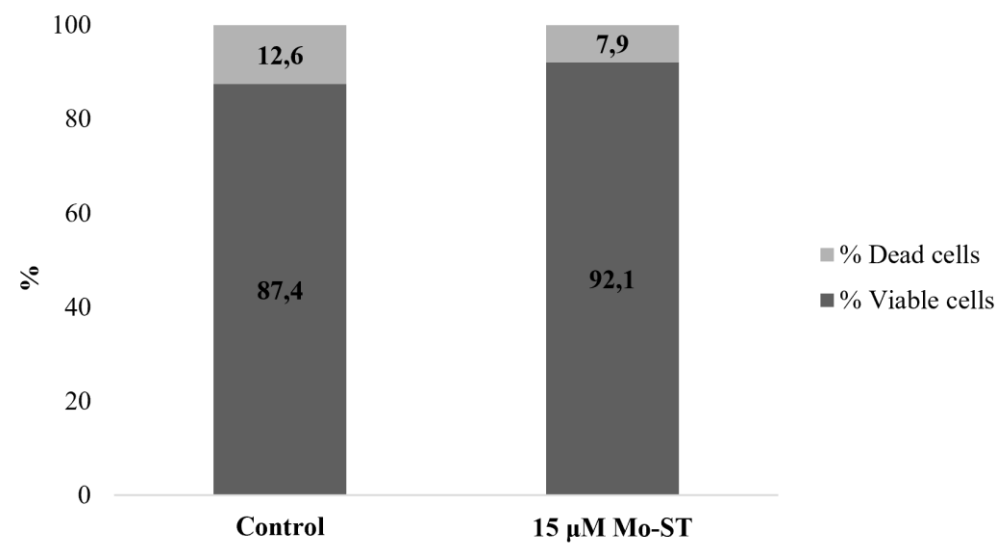

**Supplementary file S2.** Percentages of viable and dead cells in the control or after the treatment with 15 μM Mo-ST.
